# Supplementary material for: Epigenetic Age Acceleration and Hearing: Observations From the Baltimore Longitudinal Study of Aging
Source: PubMed Central journal article supplement (PMC8714776; doi:10.3389/fnagi.2021.790926), 2021-12-15
Supplement: Table_1.pdf [file Table_1.pdf]

| Supplemental Table 1. Association between summarized epigenetic measurements and hearing among those aged 60 years and above |                        |              |              |
|------------------------------------------------------------------------------------------------------------------------------|------------------------|--------------|--------------|
| Epigenetic Measurement <sup>a</sup>                                                                                          | Estimates <sup>b</sup> | Model 4      |              |
|                                                                                                                              |                        | 95% CI       | p-value      |
| AgeAccelerationResidualHannum                                                                                                | 0.08                   | -0.04 – 0.21 | 0.172        |
| IEAA                                                                                                                         | 0.07                   | -0.05 – 0.18 | 0.277        |
| AgeAccelPheno                                                                                                                | 0.05                   | -0.07 – 0.18 | 0.385        |
| AgeAccelGrim                                                                                                                 | 0.18                   | 0.04 – 0.33  | <b>0.011</b> |
| DunedinPoAm                                                                                                                  | 0.20                   | 0.07 – 0.33  | <b>0.003</b> |

Linear regression was used for calculating the association between epigenetic measurements and hearing. Speech-frequency pure tone average at better ear was used for hearing measurement, and treated as the dependent variable in the linear regression.  
Model 4: adjusted for sex, black, age, time difference between epigenetic and hearing measurements, hypertension, diabetes, congestive heart failure, peripheral arterial disease, and smoke (pack-years)

<sup>a</sup> To measure epigenetic age acceleration, the chronological age-adjusted version was used. AgeAccelerationResidualHannum is the chronological age-adjusted version for the epigenetic clock proposed by Hannum et al. IEAA is the chronological age-adjusted version for the epigenetic clock proposed by Horvath et al. AgeAccelPheno is the chronological age-adjusted version for the epigenetic clock proposed by Levine et al. AgeAccelGrim is the chronological age-adjusted version for the epigenetic clock proposed by Lu et al. DunedinPoAm is the epigenetic score proposed by Belsky et al., which did not need additional adjustment for chronological age.

<sup>b</sup> Estimates referred to the estimate of effect size.

Supplemental Figure 1. Effect sizes of epigenetic measurements on hearing using worse ear

**Relationship between epigenetic age acceleration and hearing (worse ear)**

**Blue: BLSA participants  $\geq 60$  years old (n = 197)**

**Green: all BLSA participants (n = 236)**

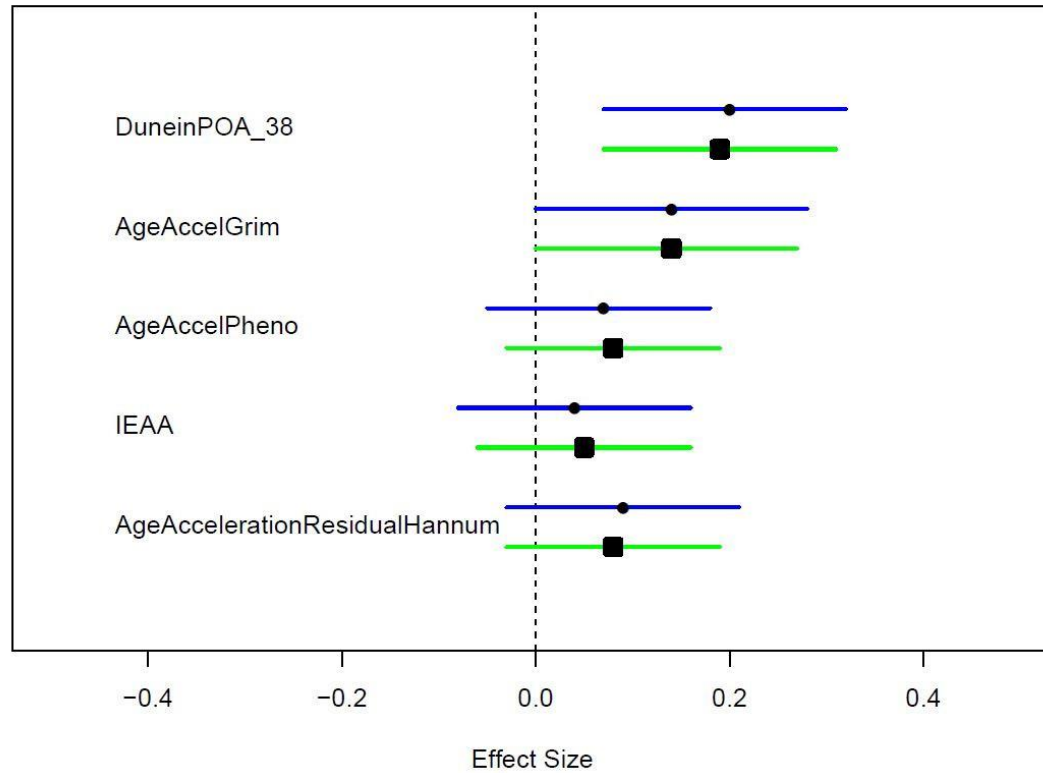

For this sensitivity analysis, the dependent variable is speech-frequency PTA at the worse ear instead of better ear. To measure epigenetic age acceleration, the chronological age-adjusted version was used. AgeAccelerationResidualHannum is the chronological age-adjusted version for the epigenetic clock proposed by Hannum et al. IEAA is the chronological age-adjusted version for the epigenetic clock proposed by Horvath et al. AgeAccelPheno is the chronological age-adjusted version for the epigenetic clock proposed by Levine et al. AgeAccelGrim is the chronological age-adjusted version for the epigenetic clock proposed by Lu et al. DunedinPoAm is the epigenetic score proposed by Belsky et al., which did not need additional adjustment for chronological age.
